# Supplementary material
Source: MDPI journal article supplement (https://www.mdpi.com/2073-4441/13/15/2057)
Supplement: s1 [file s1]

Supplementary Materials:

**Table S1.** List of primer pairs used for amplification of SSU rDNA segments, ITS region, and LSU rDNA sequences.

| Primer Name | Primer Sequence                        | Reference |
|-------------|----------------------------------------|-----------|
| EukA        | 5' -CTG GTT GAT CCT GCC AG-3'          | [36]      |
| G18R        | 5' -GCA TCA CAG ACC TGT TAT TG-3'      | [37]      |
| 570F        | 5' -GTA ATT CCA GCT CCA ATA GC-3'      | [38]      |
| EukB        | 5' -TGA TCC TTC TGC AGG TTC ACC TAC-3' | [36]      |
| ITSF2       | 5' -TAC GTC CCT GCC CTT TGT AC-3'      | [37]      |
| LSU500R     | 5' -CCC TCA TGG TAC TTG TTT GC-3'      | [37]      |
| D1RF        | 5' -ACC CGC TGA ATT TAA GCA-3'         | [39]      |
| 1483R       | 5' -GCT ACT ACC AAG ATC TGC-3'         | [40]      |

**Table S2.** List of species used in constructing nuclear SSU ribosomal (r) DNA phylogenetic trees. Genbank accession numbers are listed to the right of each species.

| Species                          | Strain no.    | Accession number | Nm sizes (bp) | Origin     |
|----------------------------------|---------------|------------------|---------------|------------|
| <i>Oxyrrhis marina</i> KRR       | OMKRR_1005    | MZ519401         | 1692          | This Study |
| <i>Oxyrrhis marina</i> SH        | OMSH_1111     | MZ519402         | 1690          |            |
| <i>Oxyrrhis marina</i> MS        | OMMS_1004     | MZ519428         | 1696          |            |
| <i>Oxyrrhis marina</i> GS        | OMGS_0105     | MZ519429         | 1675          |            |
| <i>Oxyrrhis maritima</i> JJ      | OMJJ_1305     | MZ519401         | 1671          |            |
| <i>Oxyrrhis maritima</i> HD      | OMHD_1305     | MZ536901         | 1672          |            |
| <i>Noctiluca scintillans</i>     |               | GQ380592.1       | 1788          | Hong Kong  |
| <i>Perkinsus marinus</i>         |               | AF126013.1       | 1805          | USA        |
| <i>Plasmodium falciparum</i>     | MAL10/350     | MF155937.1       | 1628          | Singapore  |
| <i>Tetrahymena pyriformis</i>    | FL191         | EF070254.1       | 1635          | Australia  |
| <i>Protocruzia adherens</i>      | Boccale       | AY217727.1       | 1752          |            |
| <i>Ectocarpus siliculosus</i>    | 3477          | AY307398.1       | 1728          |            |
| <i>Schizochytrium aggregatum</i> | ATCC 28209    | AB022106.1       | 1677          | UK         |
| <i>Oxyrrhis</i> sp               | WHOI_LI1-5-6  | AF330215.1       | 1759          |            |
| <i>Gonyaulax spinifera</i>       | GSTL1         | AF052190.1       | 1795          | Egypt      |
| <i>Sarcocystis fusiformis</i>    | Bb3.4 clone 2 | KR186116.1       | 1879          |            |
| <i>Eimeria nieschulzi</i>        |               | U40263.1         | 1797          | Nepal      |
| <i>Theileria parva</i>           |               | L02366.1         | 1742          | Australia  |
| <i>Cryptosporidium parvum</i>    | H7            | AF108865.1       | 1753          |            |
| <i>Colpodella angusta</i>        |               | KU159286.1       | 1773          |            |
| <i>Halteria grandinella</i>      |               | AY007441.1       | 1730          | USA        |
| <i>Oxytricha nova</i>            |               | X03948.1         | 1771          | Pakistan   |
| <i>Paramecium tetraurelia</i>    |               | EF502045.1       | 1748          |            |
| <i>Colpoda inflata</i>           | ATCC 30917    | M97908.1         | 1788          | Denmark    |
| <i>Tracheloraphis</i> sp         |               | L31520.1         | 1598          |            |
| <i>Blepharisma americanum</i>    |               | M97909.1         | 1724          | USA        |
| <i>Scrippsiella trochoidea</i>   | CCMP2271      | HM483396.1       | 1793          |            |
| <i>Heterocapsa rotundata</i>     | CCCM 680      | AF274267.1       | 1752          | Korea      |
| <i>Symbiodinium minutum</i>      | CCMP830       | LK934670.1       | 1691          |            |
| <i>Alexandrium tamarense</i>     | HY970328M     | AY831406.1       | 1799          | Korea      |
| <i>Lingulodinium polyedrum</i>   | LPCQ-1        | JQ616824.1       | 1715          | Mexico     |
| <i>Gymnodinium catenatum</i>     | CCMP1940      | DQ785883.1       | 1803          | Spain      |
| <i>Karlodinium</i> sp            | KAMS0708      | FN357291.1       | 1761          | Korea      |

|                             |         |            |      |
|-----------------------------|---------|------------|------|
| <i>Karenia brevis</i>       | CCMP718 | EF492501.1 | 1795 |
| <i>Amphidinium carterae</i> | CCMP121 | EF057407.1 | 1701 |

**Table S3.** List of species used in constructing nuclear ITS1-5.8S-ITS2 phylogenetic trees. Genbank accession numbers are listed to the right of each species.

| Species                        | Strain no. | Accession number | Nm sizes (bp) | Origin     |
|--------------------------------|------------|------------------|---------------|------------|
| <i>Oxyrrhis marina</i> KRR     | OMKRR_1005 | MZ519401         | 1692          | This Study |
| <i>Oxyrrhis marina</i> SH      | OMSH_1111  | MZ519402         | 1690          |            |
| <i>Oxyrrhis marina</i> MS      | OMMS_1004  | MZ519428         | 1696          |            |
| <i>Oxyrrhis marina</i> GS      | OMGS_0105  | MZ519429         | 1675          |            |
| <i>Oxyrrhis maritima</i> JJ    | OMJJ_1305  | MZ519401         | 1671          |            |
| <i>Oxyrrhis maritima</i> HD    | OMHD_1305  | MZ536901         | 1672          |            |
| <i>Oxyrrhis maritima</i>       |            | KC012387.1       | 353           | Malta      |
| <i>Oxyrrhis maritima</i>       |            | KC012384.1       | 354           | Spain      |
| <i>Oxyrrhis maritima</i>       |            | KC012383.1       | 354           | Spain      |
| <i>Oxyrrhis maritima</i>       |            | KC012374.1       | 353           | Greece     |
| <i>Oxyrrhis maritima</i>       |            | KC012372.1       | 352           | Greece     |
| <i>Oxyrrhis maritima</i>       |            | KC012370.1       | 353           | Greece     |
| <i>Oxyrrhis maritima</i>       |            | KC012357.1       | 351           | France     |
| <i>Oxyrrhis maritima</i>       |            | KC012373.1       | 353           | Greece     |
| <i>Oxyrrhis marina</i>         | CCAP1133/3 | AY566418.1       | 1603          | UK         |
| <i>Oxyrrhis marina</i>         | CCAP1133/4 | AY566417.1       | 1598          | UK         |
| <i>Oxyrrhis marina</i>         | Faro       | FJ853662.1       | 390           | UK         |
| <i>Oxyrrhis marina</i>         | Mostei     | FJ853670.1       | 390           | Portugal   |
| <i>Oxyrrhis marina</i>         | Sao Ro     | FJ853679.1       | 390           | Portugal   |
| <i>Oxyrrhis marina</i>         | Bahar      | FJ853668.1       | 405           | UK         |
| <i>Oxyrrhis marina</i>         | Naxos      | FJ853674.1       | 394           | Greece     |
| <i>Oxyrrhis marina</i>         | NaplesA    | FJ853671.1       | 392           | Italy      |
| <i>Oxyrrhis marina</i>         | NaplesC    | FJ853673.1       | 390           | Italy      |
| <i>Oxyrrhis marina</i>         | Okinaw     | FJ853675.1       | 393           | Japan      |
| <i>Oxyrrhis marina</i>         | CCMP1739   | AY566413.1       | 432           | USA        |
| <i>Oxyrrhis marina</i>         | CCMP605    | AY566414.1       | 431           | USA        |
| <i>Oxyrrhis marina</i>         | CCMP604    | AY566415.1       | 431           | USA        |
| <i>Oxyrrhis marina</i>         | CCMP1795   | AY566411.1       | 431           | USA        |
| <i>Oxyrrhis marina</i>         | CCMP1788   | AY566412.1       | 431           | UK         |
| <i>Oxyrrhis marina</i>         | Gunsan     | FJ853666.1       | 390           | Korea      |
| <i>Oxyrrhis marina</i>         | Porto      | FJ853677.1       | 405           | Greece     |
| <i>Oxyrrhis marina</i>         | Isle       | AY566410.1       | 430           | UK         |
| <i>Oxyrrhis marina</i>         | Plymouth   | FJ853676.1       | 390           | UK         |
| <i>Toxoplasma gondii</i>       | CB4        | JX456456.1       | 428           | China      |
| <i>Tetrahymena thermophila</i> | ATCC 30382 | JN547815.1       | 461           |            |
| <i>Protocruzia adherens</i>    |            | AY217728.1       | 504           |            |
| <i>Oxytricha trifallax</i>     |            | AJ286798.1       | 680           |            |
| <i>Plasmodium falciparum</i>   | CAMP       | U21939.1         | 416           |            |
| <i>Cryptosporidium parvum</i>  | KSU-1      | AH006572.2       | 1162          |            |
| <i>Perkinsus marinus</i>       |            | KJ458987.1       | 561           | Mexico     |
| <i>Perkinsus marinus</i>       |            | JQ266250.1       | 665           | Mexico     |
| <i>Noctiluca scintillans</i>   |            | KR607100.1       | 535           |            |
| <i>Besnoitia bennetti</i>      |            | MG652473.1       | 938           | Belgium    |
